# Supplementary material
Source: PubMed Central journal article supplement (PMC2794905)

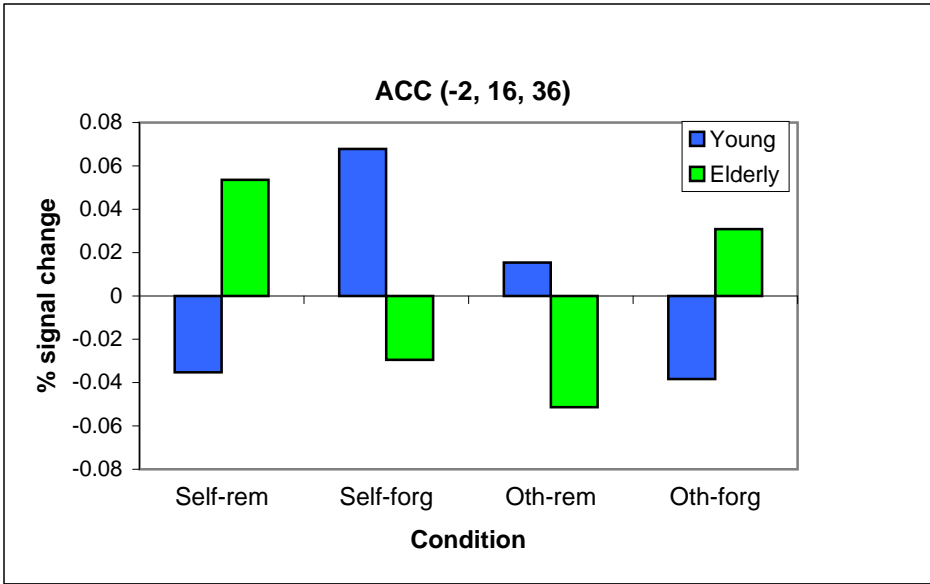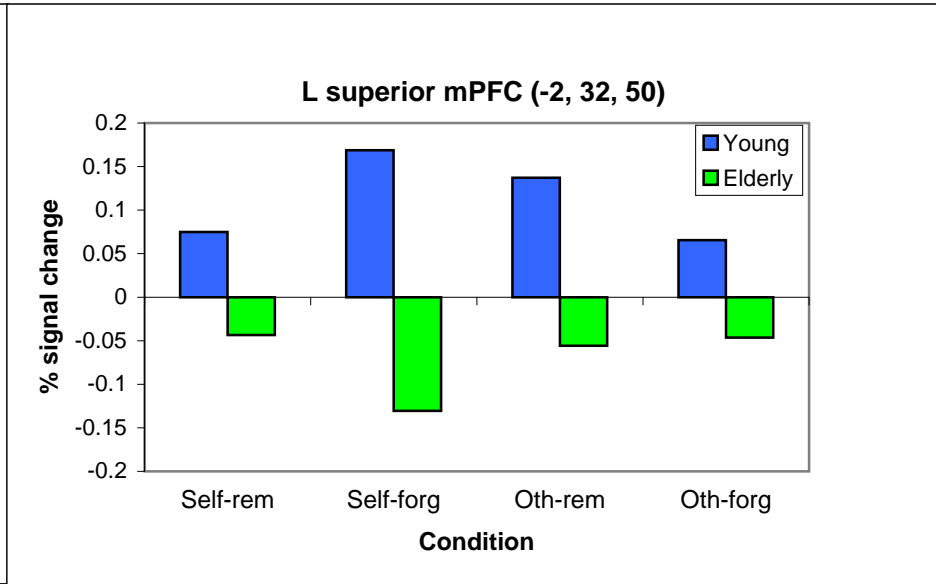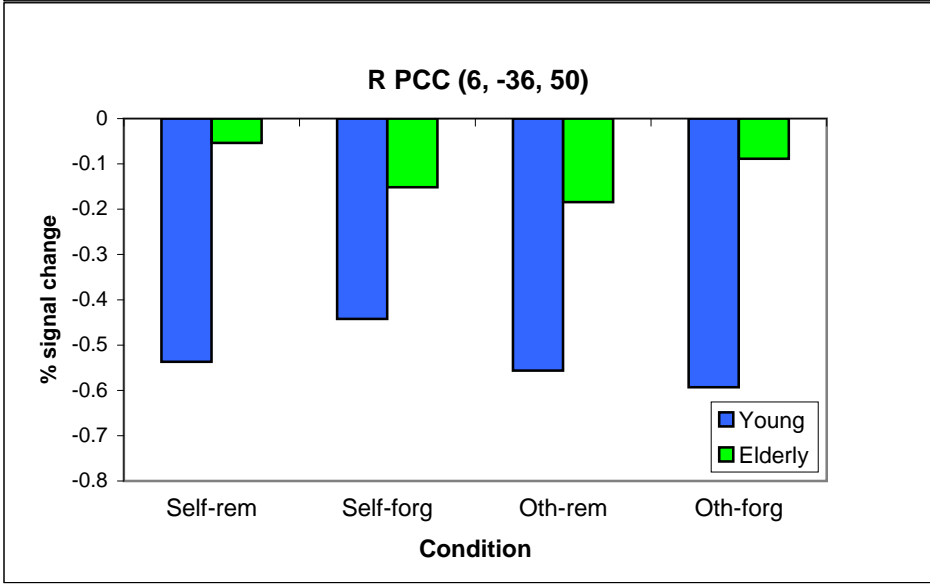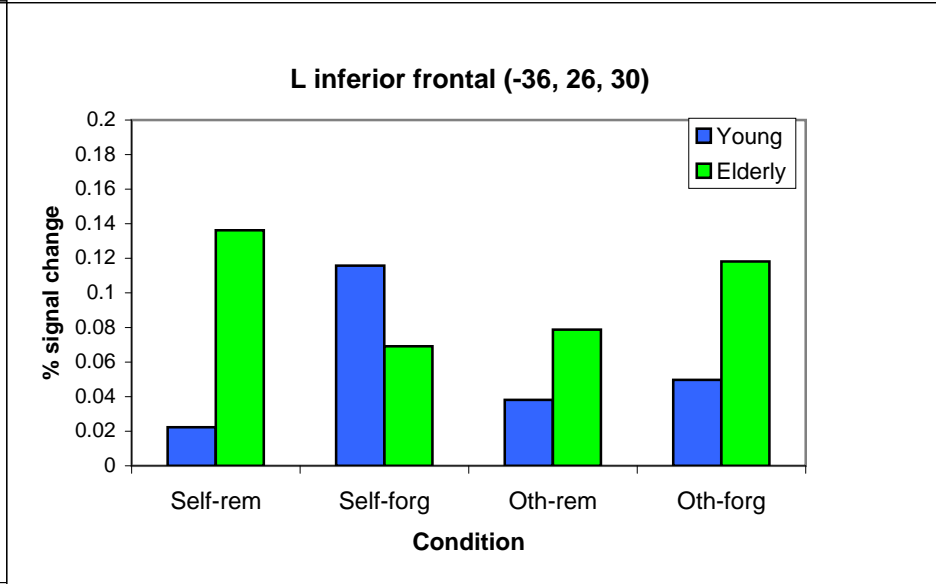

Supplementary Figure 1

Supplement: NIHMS147381-supplement-01.pdf [file NIHMS147381-supplement-01.pdf]
